# Supplementary material
Source: publisher figshare collection journal article supplement (https://tandf.figshare.com/ndownloader/files/14339792)
Supplement: Supplementary file 1 [file 14339792]

Supplementary Table 1. The primers used in the present study

| Primer's name | F-Sequence | R-Sequence |
| --- | --- | --- |
| DGKB | CCTATCAGGCGGTCTGAGAAT | GGAACACGTATTTGCAGGAGAAG |
| CALB1 | GGCTCCATTTCGACGCTGA | GCCCATACTGATCCACAAAAGTT |
| ITPR2 | CACCTTGGGGTTAGTGGATGA | CTCGGTGTGGTTCCCTTGT |
| UTRN | TGAAGGATGTCATGTCGGACC | GTTGAGGACGTTGACTTGGCT |
| MAP1B | | 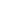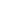ATCTCGACACTCTGCAAGATTCT | | --- | | TGTTTCTAAAACGTCACTTCGGT |
| LPHN2 | TCTGGTTGCAGAATGCGAAGT | ATCCGTCCGACCATAGTTAGC |
| ATF3 | CCTCTGCGCTGGAATCAGTC | TTCTTTCTCGTCGCCTCTTTTT |
| MARCKS | AGCCCGGTAGAGAAGGAGG | TTGGGCGAAGAAGTCGAGGA |
| ENC1 | GCTGCTGTCTGATGCACAC | AGAGTTGCACTACCATGTCCT |
| PTHLH | ATTTACGGCGACGATTCTTCC | GCTTGGAGTTAGGGGACACC |
| GRB10 | ACCACGGGCTCTGCATAAAG | ACGTCCTGGTTTGCTCGTC |
| PCDH19 | CCAAGTGCATCATCTCGCTC | TCCTGAGTCTGGATCGTAAGC |
| CCL20 | TGCTGTACCAAGAGTTTGCTC | CGCACACAGACAACTTTTTCTTT |
| GXYLT2 | TCTGAAGCCCGAGTTTGATAAGC | TGATGGGGTAGATTCTGTGCT |
| SMAD9 | CTAGGCTGGAAGCAAGGAGAT | GGGGAATCGTGACGCATTT |
| CNKSR3 | GACTGCCTGCAACAATATGTCC | CTGGTGTCCAATCCGTGTGAC |
| OLFM1 | AGGGCAGGTGTATCTGCAC | CCGTGAACACATGGTCTGCT |
| LMO2 | TCTGCCGGAGAGACTATCTCA | ATAGGCACGAATCCGCTTGTC |
| SESN2 | AAGGACTACCTGCGGTTCG | CGCCCAGAGGACATCAGTG |
| VEPH1 | TTGAAGACAGCCTTACAGAAGC | TGCCTGGTCATTGTTATTGGTTT |
| NFIB | AAAAAGCATGAGAAGCGAATGTC | ACTCCTGGCGAATATCTTTGC |
| CD24 | CTCCTACCCACGCAGATTTATTC | AGAGTGAGACCACGAAGAGAC |
| IL18 | TCTTCATTGACCAAGGAAATCGG | TCCGGGGTGCATTATCTCTAC |
